# Supplementary material
Source: PubMed Central journal article supplement (PMC3502677)
Supplement: NIHMS402715-supplement-1_si_001.pdf [file NIHMS402715-supplement-1_si_001.pdf]

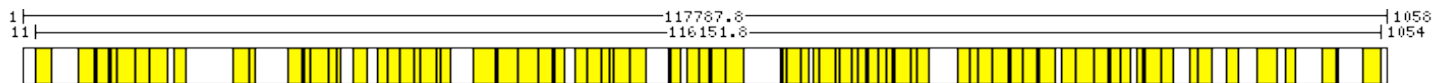

Send To: [PepCut](#) [PepStat](#) [Gap](#) [MuQuest](#) [EnzOpt](#) [Blast](#)

Header: UBA1\_RAT GN=Uba1 , Ubiquitin-like modifier-activating enzyme 1, Ubiquitin-activating enzyme E1 AC=Q5U300 OS=Rattus norvegicus (Rat).

Avg Mass: 117787.8 Coverage: 759/1058 = **71.7%** by amino acid count, 84150.2/117787.8 = **71.4%** by mass

MSSSPLSKKR **RVSGDPKPG** **SNCSSAQSVL** SEVSSVPTNG MAK**NGSEADI** **DESLYSRQLY** **VLGHEAMKML**  
**QTSSVLVSGL** **RGLGVEIAKN** **IILGGVKAVT** **LHDQGTQWA** **DLS**SQFY**LRE** **EDIGKNRAEV** SQPRLAELNS  
YVPVTAYTGP LVEDFLSGFQ VVVL**TNSPLE** **EQLR****VGEFCH** **SG**GIKLVVAD TRGLFGQLFC DFGEEM**VLTD**  
**SNGEQPLSAM** **VSMVTK****DNPG** **VVTCLDEARH** **GFETGDFVSF** SEVQGM**VQLN** **GCQPIEIKVL** GPYTF**SICDT**  
**SNFSDYIRGG** **IVSQVKVPPK** **ISFKSLPASL** **AEPDFVMTDF** **AKYSRPAQLH** **IGFQALHQFC** AQHNRPPRPR  
**NEEDATELVT** **LAQAVNARSP** **PAVQODNVDE** **DLIRKLAYVA** **AGDLAPINAF** **IGGLAAQEV** **KACSGKFMPI**  
**MQWLYFDAL**E **CLPEDKEALT** **EDKCLPRQNR** **YDGQVAVFGS** **DLQEKLGKQK** **YFLVGAGAIG** **CELLKNFAMI**  
GLGCGEGGEV **VVTDMDTIEK** **SNLNR****QFLFR** **PWDVTKLKSD** **TAAAVRQMN** **PYIQVTSHQN** **RVGPDTERIY**  
DDDFQNLGD VANALDNVDA RMYMDRRC**VY** **YRKPLLESGT** **LGTKGNVQVV** IPFL**TESYSS** **SQDPPEKSIP**  
**ICTLKNFPNA** **IEHTLOWARD** **EFEGLFKQPA** **ENVNQYLTD**S **KFVERTLRLA** **GTQPLEVLEA** **VQPSLVLQRP**  
**QWGD**CVTWA CHHWHTQYCN NIRQL**LHNFP** **PDQLTSSGAP** **FWSGPKRCPH** **PLTFDVNNTL** **HLDYVMAAN**  
**LFAQTYGLTG** **SQDRAAVASL** **LQSVQVPEFT** **PKSGVKIHVS** **DQELQSANAS** **VDDSRLEELK** **ATLPSPKLP**  
**GFKMYPIDFE** **KDDDSNFHMD** **FIVAASNLRA** **ENYDISPADR** **HKSCLIAGKI** **IPAIATTTAA** **VVGLVCLELY**  
**KVVGHQQLD** **SYKNGFLNLA** **LPFFGFSEPL** **AAPRHQYYNQ** **EWTLWDR****FEV** **QGLQNGEEM** **TLKQFLDYFK**  
**TEHKLEITML** **SQGVSMLYSF** **FMPAAKLKER** **LDQPMTEIVS** **RVSKRKLGRH** **VRALVLELCC** **NDESGEDVEV**  
**PYVRYTIR**

The coverage obtained for the tri enzyme digest of ubiquitin activating enzyme E1 was approximately 71%. The amino acids covered by mass spec are shown in red and the two peptides containing the S-(ethylaminocarbonyl) cysteine adducts are highlighted with green.

## Masses of Fragments Produced by DNPGVVTCLDEAR

| <b>b</b>     | <b>b++</b> |    |   |    | <b>y</b>     | <b>y++</b> |
|--------------|------------|----|---|----|--------------|------------|
| 116.034      | 58.521     | 1  | D | 13 | 1445.69<br>9 | 723.353    |
| 230.077      | 115.542    | 2  | N | 12 | 1330.67<br>2 | 665.840    |
| 327.130      | 164.069    | 3  | P | 11 | 1216.62<br>9 | 608.818    |
| 384.151      | 192.579    | 4  | G | 10 | 1119.57<br>7 | 560.292    |
| 483.220      | 242.114    | 5  | V | 9  | 1062.55<br>5 | 531.781    |
| 582.288      | 291.648    | 6  | V | 8  | 963.487      | 482.247    |
| 683.336      | 342.172    | 7  | T | 7  | 864.418      | 432.713    |
| 843.397      | 422.202    | 8  | C | 6  | 763.371      | 382.189    |
| 956.481      | 478.744    | 9  | L | 5  | 603.310      | 302.158    |
| 1071.50<br>8 | 536.258    | 10 | D | 4  | 490.226      | 245.616    |
| 1200.55<br>0 | 600.779    | 11 | E | 3  | 375.199      | 188.103    |
| 1271.58<br>8 | 636.297    | 12 | A | 2  | 246.156      | 123.582    |
| 1427.68<br>9 | 714.348    | 13 | R | 1  | 175.119      | 88.063     |

Masses obtained for the non DEDC modified peptide containing the +58Da adduct on Cys234 resulting alkylation with iodoacetamide. This was the only peptide identified in control animal samples.

| <b>b</b>     | <b>b++</b> |    |   |    | <b>y</b>     | <b>y++</b> |
|--------------|------------|----|---|----|--------------|------------|
| 116.034      | 58.521     | 1  | D | 13 | 1459.68<br>4 | 730.346    |
| 230.077      | 115.542    | 2  | N | 12 | 1344.65<br>7 | 672.832    |
| 327.130      | 164.069    | 3  | P | 11 | 1230.61<br>4 | 615.811    |
| 384.151      | 192.579    | 4  | G | 10 | 1133.56<br>2 | 567.284    |
| 483.220      | 242.114    | 5  | V | 9  | 1076.54<br>0 | 538.774    |
| 582.288      | 291.648    | 6  | V | 8  | 977.472      | 489.240    |
| 683.336      | 342.172    | 7  | T | 7  | 878.403      | 439.705    |
| 857.382      | 429.195    | 8  | C | 6  | 777.356      | 389.181    |
| 970.466      | 485.737    | 9  | L | 5  | 603.310      | 302.158    |
| 1085.49<br>3 | 543.250    | 10 | D | 4  | 490.226      | 245.616    |
| 1214.53<br>5 | 607.771    | 11 | E | 3  | 375.199      | 188.103    |
| 1285.57<br>3 | 643.290    | 12 | A | 2  | 246.156      | 123.582    |
| 1441.67<br>4 | 721.340    | 13 | R | 1  | 175.119      | 88.063     |

Masses obtained for the DEDC modified peptide demonstrating the presence of the S-(ethylaminocarbony) cysteine adduct (+71Da) on Cys234 identified in samples obtained from exposed animals.

## Masses of Fragments Produced by VGEFCHSR

| <b>b</b> | <b>b++</b> |   |   |   | <b>y</b> | <b>y++</b> |
|----------|------------|---|---|---|----------|------------|
| 100.076  | 50.541     | 1 | V | 8 | 991.472  | 496.240    |
| 157.097  | 79.052     | 2 | G | 7 | 892.403  | 446.705    |
| 286.140  | 143.574    | 3 | E | 6 | 835.382  | 418.195    |
| 433.208  | 217.108    | 4 | F | 5 | 706.339  | 353.673    |
| 593.269  | 297.138    | 5 | C | 4 | 559.271  | 280.139    |
| 730.328  | 365.668    | 6 | H | 3 | 399.210  | 200.109    |
| 817.360  | 409.184    | 7 | S | 2 | 262.151  | 131.579    |
| 973.461  | 487.234    | 8 | R | 1 | 175.119  | 88.063     |

Masses obtained for the non DEDC modified peptide containing the +58Da adduct on Cys179 resulting from alkylation with iodoacetamide. This was the only peptide identified in control animal samples.

| <b>b</b> | <b>b++</b> |   |   |   | <b>y</b>     | <b>y++</b> |
|----------|------------|---|---|---|--------------|------------|
| 100.076  | 50.541     | 1 | V | 8 | 1005.45<br>7 | 503.232    |
| 157.097  | 79.052     | 2 | G | 7 | 906.388      | 453.698    |
| 286.140  | 143.574    | 3 | E | 6 | 849.367      | 425.187    |
| 433.208  | 217.108    | 4 | F | 5 | 720.324      | 360.666    |
| 607.254  | 304.131    | 5 | C | 4 | 573.256      | 287.132    |
| 744.313  | 372.660    | 6 | H | 3 | 399.210      | 200.109    |
| 831.345  | 416.176    | 7 | S | 2 | 262.151      | 131.579    |
| 987.446  | 494.227    | 8 | R | 1 | 175.119      | 88.063     |

Masses obtained for the DEDC modified peptide demonstrating the presence of the S-(ethylaminocarbony) cysteine adduct (+71Da) on Cys179 identified in samples obtained from exposed animals.

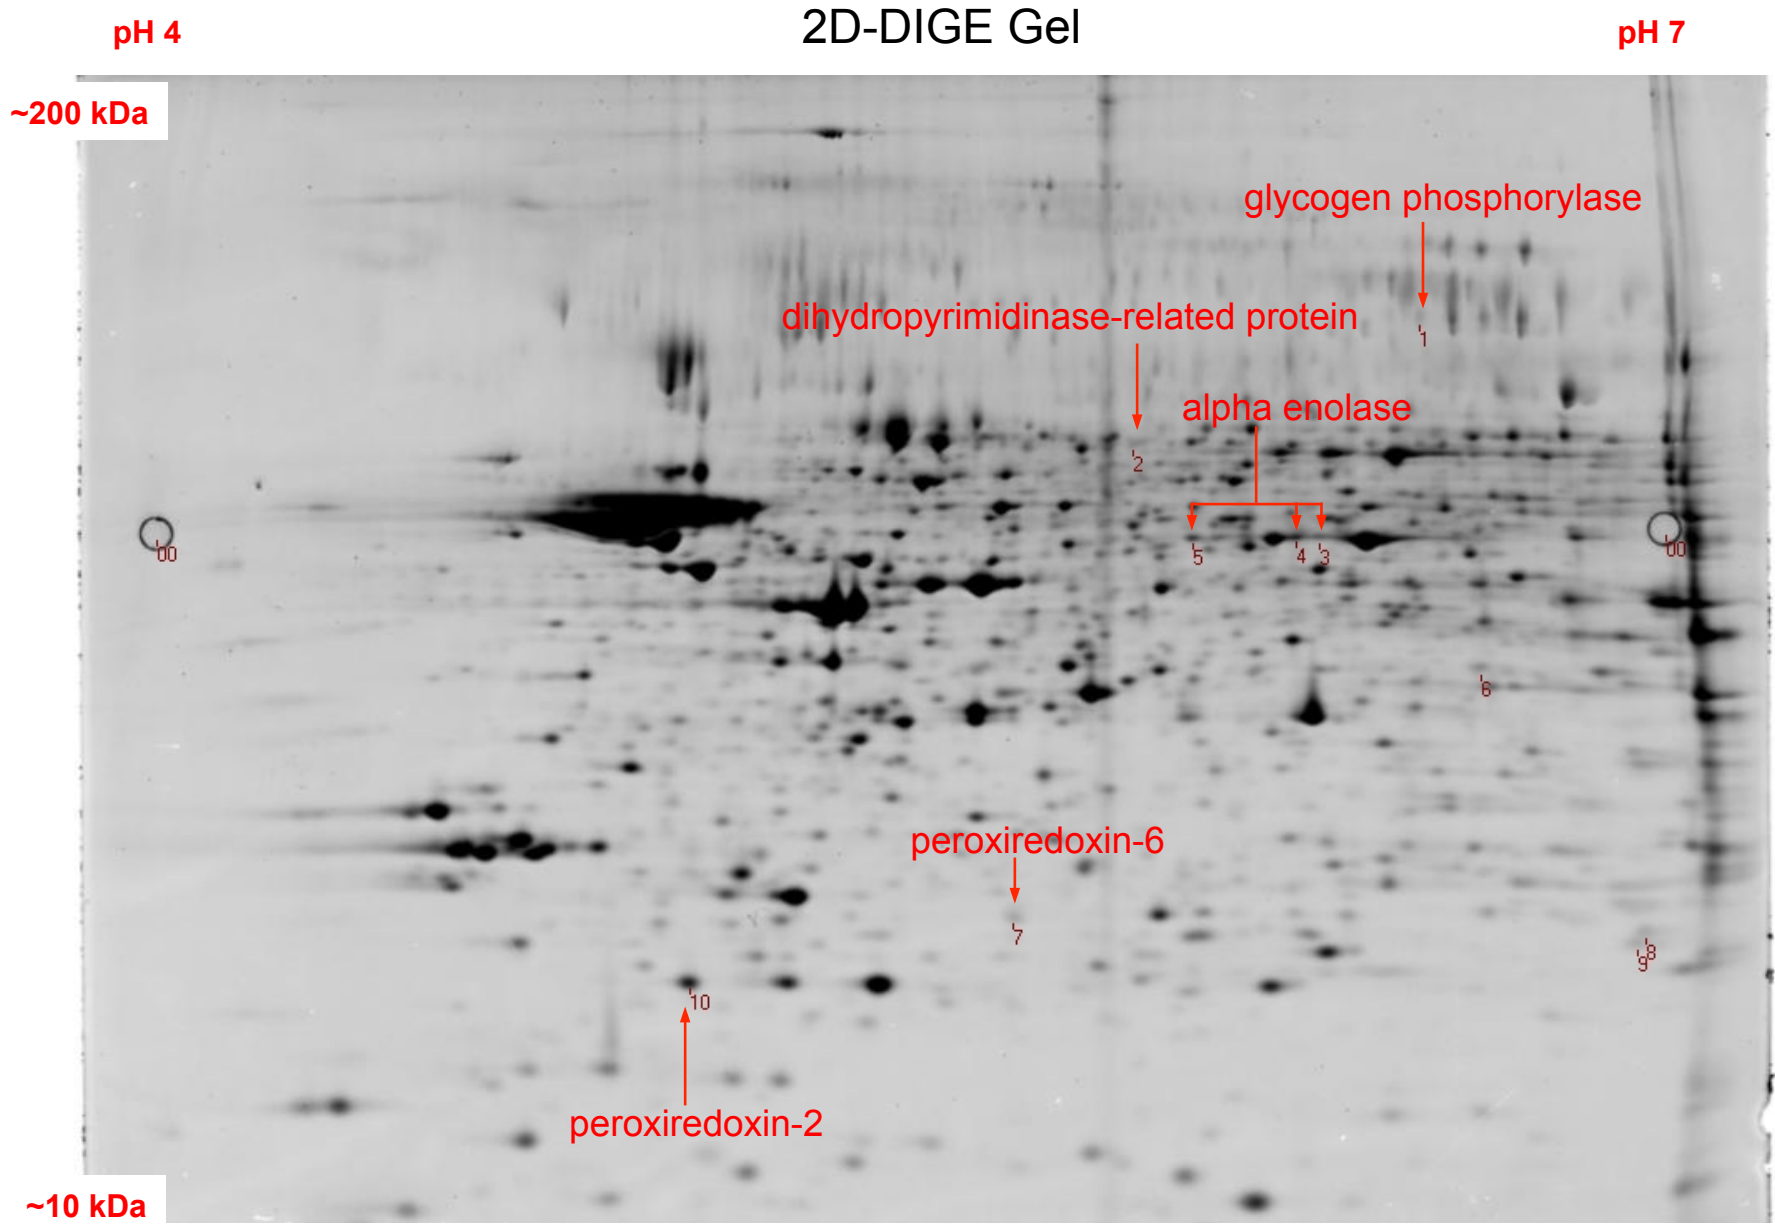

2D DIGE gel showing approximate molecular weight and isoelectric points (pH 4-7) of proteins exhibiting altered expression in brains of rats treated with N,N-diethyldithiocarbamate.

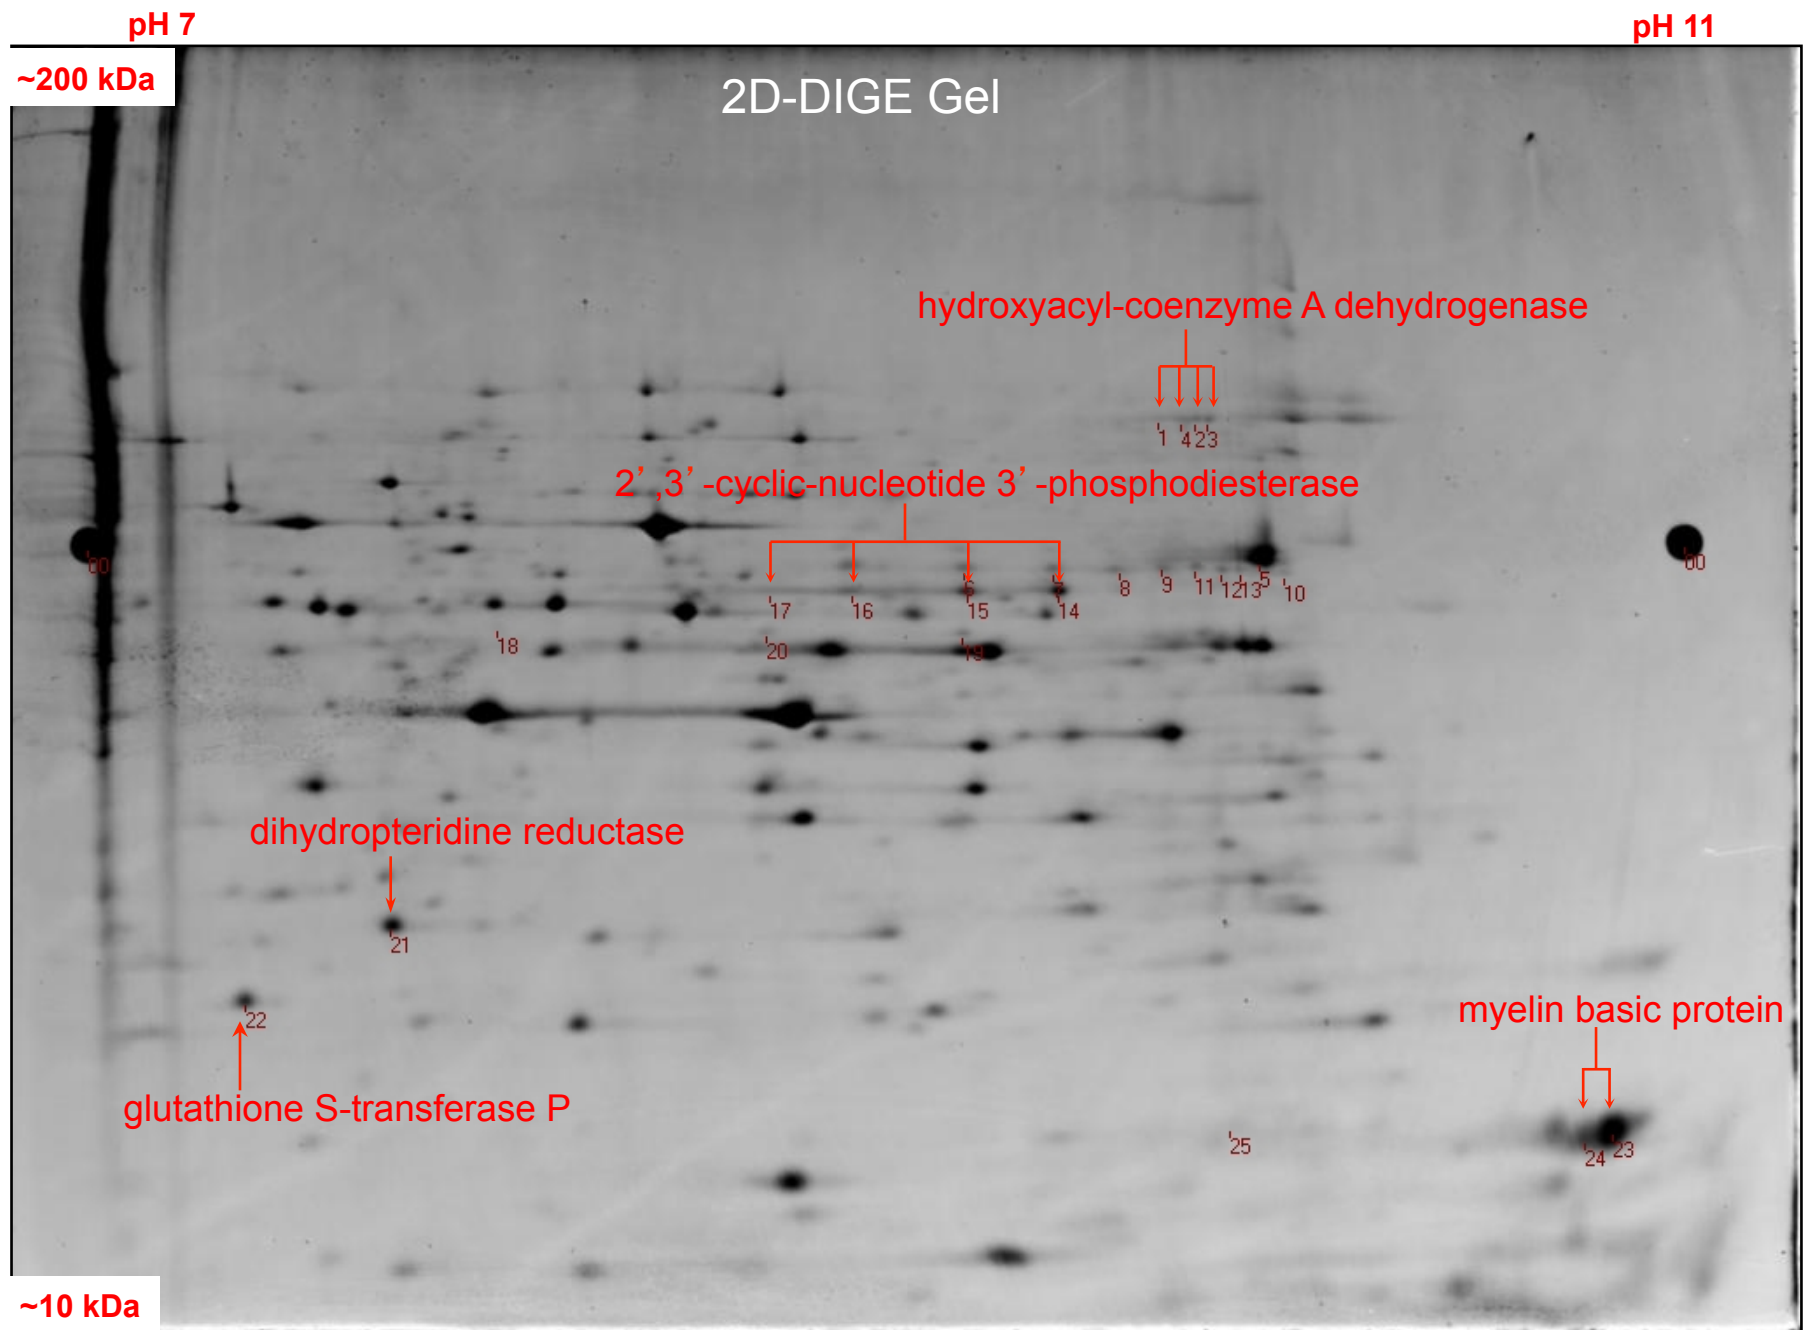

2D DIGE gel showing approximate molecular weight and isoelectric points (pH 7-11) of proteins exhibiting altered expression in brains of rats treated with N,N-diethylidithiocarbamate.
